# Supplementary material for: Single-cell transcriptome conservation in cryopreserved cells and tissues
Source: PubMed Central journal article supplement (PMC5333448; doi:10.1186/s13059-017-1171-9), 2017-03-01
Supplement: 13059_2017_1171_MOESM2_ESM.pdf [file 13059_2017_1171_MOESM2_ESM.pdf]

**Table S1:** Overview table of experiments.

| Cells/tissue                 | Type      | Species | Method    | No. | Condition     | Storage   | Empty wells |     | Cells <100K | Cells filtered |
|------------------------------|-----------|---------|-----------|-----|---------------|-----------|-------------|-----|-------------|----------------|
|                              |           |         |           |     |               |           | Cells       | (%) | reads (%)   | (%)            |
| K562                         | Cell line | Human   | MARS-Seq  | 1   | Fresh         | N/A       | 16          | 27  | 0           | 0              |
| K562                         | Cell line | Human   | MARS-Seq  | 1   | Cryopreserved | -80°C     | 18          | 18  | 0           | 0              |
| K562                         | Cell line | Human   | SMARTseq2 | 2   | Fresh         | N/A       | 24          | N/A | 0           | 0              |
| K562                         | Cell line | Human   | SMARTseq2 | 2   | Cryopreserved | -80°C     | 23          | N/A | 0           | 0              |
| HEK293                       | Cell line | Human   | MARS-Seq  | 1   | Fresh         | N/A       | 57          | 5   | 2           | 0              |
| HEK293                       | Cell line | Human   | MARS-Seq  | 1   | Cryopreserved | -80°C     | 53          | 4   | 0           | 0              |
| HEK293                       | Cell line | Human   | MARS-Seq  | 2   | Fresh         | N/A       | 58          | 8   | 0           | 0              |
| HEK293                       | Cell line | Human   | MARS-Seq  | 2   | Cryopreserved | -80°C     | 44          | 30  | 0           | 0              |
| HEK293                       | Cell line | Human   | MARS-Seq  | 2   | Cryopreserved | Liquid N2 | 40          | 38  | 0           | 0              |
| HEK293                       | Cell line | Human   | SMARTseq2 | 3   | Fresh         | N/A       | 24          | N/A | 0           | 0              |
| HEK293                       | Cell line | Human   | SMARTseq2 | 3   | Cryopreserved | -80°C     | 24          | N/A | 0           | 0              |
| NIH3T3                       | Cell line | Mouse   | MARS-Seq  | 1   | Fresh         | N/A       | 56          | 7   | 0           | 0              |
| NIH3T3                       | Cell line | Mouse   | MARS-Seq  | 1   | Cryopreserved | -80°C     | 51          | 7   | 2           | 0              |
| MDCK                         | Cell line | Dog     | MARS-Seq  | 1   | Fresh         | N/A       | 54          | 10  | 0           | 0              |
| MDCK                         | Cell line | Dog     | MARS-Seq  | 1   | Cryopreserved | -80°C     | 45          | 18  | 2           | 2              |
| Mouse colon                  | Primary   | Mouse   | MARS-Seq  | 1   | Fresh         | N/A       | 88          | 7   | 5           | 18             |
| Mouse colon                  | Primary   | Mouse   | MARS-Seq  | 1   | Cryopreserved | -80°C     | 181         | 4   | 7           | 15             |
| Ovarian tumor                | Xenograft | Human   | MARS-Seq  | 1   | Fresh         | N/A       | 132         | 21  | 4           | 5              |
| Ovarian tumor                | Xenograft | Human   | MARS-Seq  | 1   | Cryopreserved | -80°C     | 115         | 25  | 9           | 15             |
| Lung tumor                   | Xenograft | Human   | SMARTseq2 | 1   | Cryopreserved | -80°C     | 42          | N/A | 0           | 0              |
| PBMC                         | Primary   | Human   | MARS-Seq  | 1   | Fresh         | N/A       | 161         | 16  | 1           | 8              |
| PBMC                         | Primary   | Human   | MARS-Seq  | 1   | Cryopreserved | -80°C     | 180         | 6   | 1           | 22             |
| <b>TOTAL</b>                 |           |         |           |     |               |           | <b>1486</b> |     | <b>3</b>    | <b>8</b>       |
| <b>TOTAL (fresh)</b>         |           |         |           |     |               |           | <b>670</b>  |     | <b>2</b>    | <b>5</b>       |
| <b>TOTAL (cryopreserved)</b> |           |         |           |     |               |           | <b>816</b>  |     | <b>3</b>    | <b>11</b>      |

**Table S2:** Differential gene expression between fresh and cryopreserved K562 cells. (MARS-Seq; top 40 genes).

| Gene          | Lower bound | log2 fold change | Upper bound | p-value  | Adj p-value     |
|---------------|-------------|------------------|-------------|----------|-----------------|
| DHFR          | -2,84       | -1,85            | -0,92       | 6,72E-05 | <b>6,49E-01</b> |
| MT-ATP6       | -2,48       | -1,49            | -0,69       | 1,45E-04 | <b>7,00E-01</b> |
| MTRNR2L8      | -2,74       | -1,82            | -0,83       | 3,31E-04 | <b>1,00E+00</b> |
| MT-ND2        | -2,28       | -1,49            | -0,63       | 5,47E-04 | <b>1,00E+00</b> |
| MTRNR2L12     | -3,40       | -2,38            | -1,02       | 5,96E-04 | <b>1,00E+00</b> |
| ANKRD30BL     | -1,78       | -1,09            | -0,46       | 1,33E-03 | <b>1,00E+00</b> |
| MT-ND5        | -1,78       | -1,09            | -0,43       | 1,57E-03 | <b>1,00E+00</b> |
| MT-ND3        | -3,73       | -2,28            | -0,86       | 1,57E-03 | <b>1,00E+00</b> |
| MTATP6P1      | -3,20       | -2,01            | -0,79       | 1,94E-03 | <b>1,00E+00</b> |
| RP11-352E6.2  | -3,20       | -1,65            | -0,63       | 2,27E-03 | <b>1,00E+00</b> |
| MT-CO2        | -2,18       | -1,32            | -0,50       | 2,36E-03 | <b>1,00E+00</b> |
| MT-CYB        | -1,85       | -1,12            | -0,40       | 2,45E-03 | <b>1,00E+00</b> |
| MTCO2P2       | -2,84       | -1,68            | -0,63       | 2,71E-03 | <b>1,00E+00</b> |
| MT-TI         | -3,53       | -2,08            | -0,69       | 2,78E-03 | <b>1,00E+00</b> |
| MTND5P11      | -2,64       | -1,55            | -0,50       | 4,28E-03 | <b>1,00E+00</b> |
| SMAD2         | -2,77       | -1,62            | -0,53       | 4,46E-03 | <b>1,00E+00</b> |
| RP11-475J5.4  | -3,10       | -1,82            | -0,53       | 6,28E-03 | <b>1,00E+00</b> |
| MT-ND4L       | -3,10       | -1,88            | -0,56       | 6,31E-03 | <b>1,00E+00</b> |
| MTND1P23      | -1,58       | -0,86            | -0,23       | 7,92E-03 | <b>1,00E+00</b> |
| PLCB4         | -3,23       | -2,08            | -0,59       | 7,96E-03 | <b>1,00E+00</b> |
| HIST1H1E      | -2,38       | -1,39            | -0,40       | 8,60E-03 | <b>1,00E+00</b> |
| MTND1P27      | -1,98       | -1,06            | -0,26       | 8,78E-03 | <b>1,00E+00</b> |
| ID3           | 0,46        | 1,95             | 2,94        | 8,96E-03 | <b>1,00E+00</b> |
| MT-ND4        | -1,42       | -0,89            | -0,23       | 9,41E-03 | <b>1,00E+00</b> |
| PPM1L         | -3,23       | -1,95            | -0,46       | 1,27E-02 | <b>1,00E+00</b> |
| MTRNR2L1      | -1,72       | -0,96            | -0,20       | 1,58E-02 | <b>1,00E+00</b> |
| ECHDC3        | -2,87       | -1,72            | -0,36       | 1,59E-02 | <b>1,00E+00</b> |
| ELOVL7        | -2,84       | -1,49            | -0,30       | 1,62E-02 | <b>1,00E+00</b> |
| MTRNR2L6      | -2,84       | -1,58            | -0,30       | 1,75E-02 | <b>1,00E+00</b> |
| DDIT4         | 0,36        | 2,05             | 3,33        | 1,82E-02 | <b>1,00E+00</b> |
| MT-ATP8       | -2,11       | -1,16            | -0,20       | 1,88E-02 | <b>1,00E+00</b> |
| RP11-120M18.2 | -2,81       | -1,68            | -0,33       | 1,96E-02 | <b>1,00E+00</b> |
| MTND2P28      | -2,57       | -1,39            | -0,20       | 2,34E-02 | <b>1,00E+00</b> |
| AC105402.4    | -2,71       | -1,52            | -0,20       | 2,39E-02 | <b>1,00E+00</b> |
| RP11-475J5.8  | -1,72       | -0,89            | -0,13       | 2,56E-02 | <b>1,00E+00</b> |
| EXOSC3        | -2,18       | -1,16            | -0,17       | 2,71E-02 | <b>1,00E+00</b> |
| DYNC2H1       | -2,81       | -1,68            | -0,17       | 3,12E-02 | <b>1,00E+00</b> |
| TSC22D4       | 0,10        | 1,16             | 2,81        | 3,21E-02 | <b>1,00E+00</b> |
| MTND4P12      | -1,95       | -0,99            | -0,10       | 3,29E-02 | <b>1,00E+00</b> |
| IER2          | -1,98       | -1,02            | -0,10       | 3,50E-02 | <b>1,00E+00</b> |

**Table S3:** Differential gene expression between fresh and cryopreserved HEK293 cells.  
(MARS-Seq; top 40 genes).

| <b>Gene</b>   | <b>Lower bound</b> | <b>log2 fold change</b> | <b>Upper bound</b> | <b>p-value</b> | <b>Adj p-value</b> |
|---------------|--------------------|-------------------------|--------------------|----------------|--------------------|
| RP11-849F2.7  | 0,89               | 1,72                    | 2,58               | 2,67E-05       | <b>1,19E-01</b>    |
| RPL26         | 0,89               | 1,72                    | 2,58               | 2,76E-05       | <b>1,19E-01</b>    |
| RPL9          | 0,79               | 1,56                    | 2,35               | 3,14E-05       | <b>1,19E-01</b>    |
| RPS24         | 0,96               | 1,92                    | 2,78               | 3,84E-05       | <b>1,19E-01</b>    |
| RP3-417G15.1  | 1,03               | 2,09                    | 3,05               | 6,22E-05       | <b>1,54E-01</b>    |
| RPL26P19      | 0,83               | 1,75                    | 2,65               | 1,00E-04       | <b>2,07E-01</b>    |
| MT-RNR1       | 1,22               | 2,55                    | 3,61               | 1,23E-04       | <b>2,18E-01</b>    |
| MT-ND2        | 0,73               | 1,72                    | 2,71               | 3,09E-04       | <b>4,77E-01</b>    |
| MT-CYB        | 0,63               | 1,56                    | 2,55               | 6,28E-04       | <b>8,43E-01</b>    |
| RP13-258O15.1 | 0,66               | 1,62                    | 2,58               | 6,82E-04       | <b>8,43E-01</b>    |
| MTRNR2L12     | 0,89               | 2,25                    | 3,61               | 7,80E-04       | <b>8,44E-01</b>    |
| MT-ATP6       | 0,60               | 1,59                    | 2,58               | 8,20E-04       | <b>8,44E-01</b>    |
| MTATP6P1      | 0,66               | 1,82                    | 2,98               | 1,26E-03       | <b>1,00E+00</b>    |
| RPS27         | 0,53               | 1,56                    | 2,45               | 2,13E-03       | <b>1,00E+00</b>    |
| MT-CO2        | 0,50               | 1,49                    | 2,55               | 2,31E-03       | <b>1,00E+00</b>    |
| DHFR          | 0,50               | 1,59                    | 2,58               | 3,75E-03       | <b>1,00E+00</b>    |
| XIST          | 0,33               | 1,13                    | 1,85               | 4,11E-03       | <b>1,00E+00</b>    |
| RPS24P17      | 0,53               | 1,75                    | 2,85               | 4,65E-03       | <b>1,00E+00</b>    |
| RPL9P9        | 0,30               | 1,03                    | 1,79               | 4,70E-03       | <b>1,00E+00</b>    |
| RPS24P8       | 0,46               | 1,62                    | 2,71               | 5,51E-03       | <b>1,00E+00</b>    |
| NPM1          | 0,20               | 0,79                    | 1,36               | 5,84E-03       | <b>1,00E+00</b>    |
| MTCO2P2       | 0,46               | 1,89                    | 3,21               | 7,49E-03       | <b>1,00E+00</b>    |
| SMAD2         | 0,40               | 1,72                    | 2,98               | 8,36E-03       | <b>1,00E+00</b>    |
| PTMAP2        | 0,23               | 0,96                    | 1,62               | 9,24E-03       | <b>1,00E+00</b>    |
| EPB42         | 0,33               | 1,39                    | 2,45               | 9,52E-03       | <b>1,00E+00</b>    |
| RPS29         | 0,17               | 0,83                    | 1,46               | 1,12E-02       | <b>1,00E+00</b>    |
| SLC12A3       | 0,33               | 1,59                    | 2,78               | 1,13E-02       | <b>1,00E+00</b>    |
| MTRNR2L8      | 0,30               | 1,62                    | 2,95               | 1,52E-02       | <b>1,00E+00</b>    |
| NPM1P27       | 0,13               | 0,83                    | 1,49               | 1,66E-02       | <b>1,00E+00</b>    |
| RP11-507E23.1 | 0,23               | 1,39                    | 2,45               | 1,67E-02       | <b>1,00E+00</b>    |
| LDHB          | 0,10               | 0,73                    | 1,36               | 1,79E-02       | <b>1,00E+00</b>    |
| NUCKS1        | 0,13               | 0,96                    | 1,72               | 1,84E-02       | <b>1,00E+00</b>    |
| PRDX1         | 0,07               | 0,73                    | 1,36               | 2,30E-02       | <b>1,00E+00</b>    |
| FAM172A       | 0,07               | 0,70                    | 1,29               | 2,47E-02       | <b>1,00E+00</b>    |
| RPL34         | 0,10               | 0,96                    | 1,79               | 2,50E-02       | <b>1,00E+00</b>    |
| PTMAP5        | 0,07               | 0,70                    | 1,29               | 2,50E-02       | <b>1,00E+00</b>    |
| MTRNR2L1      | 0,13               | 1,26                    | 2,45               | 2,63E-02       | <b>1,00E+00</b>    |
| SLC26A3       | 0,17               | 1,52                    | 2,88               | 2,75E-02       | <b>1,00E+00</b>    |
| MT-ND4        | 0,07               | 0,76                    | 1,49               | 2,85E-02       | <b>1,00E+00</b>    |
| BAIAP2L1      | 0,07               | 0,89                    | 1,62               | 2,93E-02       | <b>1,00E+00</b>    |

**Table S4:** Differential gene expression between fresh and cryopreserved NIH3T3 cells. (MARS-Seq; top 40 genes).

| Gene          | Lower bound | log2 fold change | Upper bound | p-value  | Adj p-value |
|---------------|-------------|------------------|-------------|----------|-------------|
| Rps4x         | 0,85        | 1,81             | 2,70        | 1,09E-04 | 1,00E+00    |
| Gm10925       | 0,68        | 2,01             | 3,38        | 2,30E-03 | 1,00E+00    |
| Gm9294        | 0,51        | 1,54             | 2,49        | 2,98E-03 | 1,00E+00    |
| Gm28661       | 0,55        | 2,05             | 3,55        | 6,55E-03 | 1,00E+00    |
| Rps25         | 0,34        | 1,30             | 2,19        | 6,87E-03 | 1,00E+00    |
| B2m           | 0,31        | 1,23             | 2,19        | 7,74E-03 | 1,00E+00    |
| mt-Atp6       | 0,48        | 1,91             | 3,41        | 7,76E-03 | 1,00E+00    |
| Npm1          | 0,27        | 1,23             | 2,15        | 8,39E-03 | 1,00E+00    |
| mt-Nd2        | 0,34        | 1,54             | 2,77        | 8,93E-03 | 1,00E+00    |
| mt-Co2        | 0,44        | 1,95             | 3,41        | 9,23E-03 | 1,00E+00    |
| mt-Rnr1       | 0,38        | 1,64             | 2,80        | 9,94E-03 | 1,00E+00    |
| mt-Nd1        | 0,24        | 1,20             | 2,19        | 1,05E-02 | 1,00E+00    |
| mt-Cytb       | 0,24        | 1,20             | 2,29        | 1,08E-02 | 1,00E+00    |
| Gm14681       | 0,27        | 1,26             | 2,22        | 1,09E-02 | 1,00E+00    |
| Gm13341       | 0,27        | 1,71             | 3,11        | 1,80E-02 | 1,00E+00    |
| S100a11       | 0,14        | 0,99             | 1,84        | 2,04E-02 | 1,00E+00    |
| Gm29216       | 0,10        | 0,99             | 1,84        | 2,25E-02 | 1,00E+00    |
| Anxa1         | 0,07        | 0,96             | 1,78        | 2,80E-02 | 1,00E+00    |
| Gm28439       | 0,10        | 1,23             | 2,39        | 2,89E-02 | 1,00E+00    |
| Gas5          | 0,07        | 0,79             | 1,50        | 3,08E-02 | 1,00E+00    |
| mt-Nd4        | 0,03        | 0,82             | 1,64        | 3,33E-02 | 1,00E+00    |
| Rps25-ps1     | 0,07        | 1,09             | 2,08        | 3,46E-02 | 1,00E+00    |
| Eif3e         | 0,07        | 1,16             | 2,22        | 3,61E-02 | 1,00E+00    |
| Rps15a        | 0,03        | 1,20             | 2,25        | 4,02E-02 | 1,00E+00    |
| mt-Co1        | 0,00        | 0,72             | 1,54        | 4,73E-02 | 1,00E+00    |
| Gm28437       | 0,00        | 1,23             | 2,49        | 4,76E-02 | 1,00E+00    |
| Rps15a-ps7    | -0,14       | 1,47             | 2,90        | 6,74E-02 | 1,00E+00    |
| Rps24         | -0,07       | 0,51             | 1,06        | 6,81E-02 | 1,00E+00    |
| Gm10222       | -0,14       | 1,37             | 2,77        | 7,19E-02 | 1,00E+00    |
| Nr1d2         | -0,14       | 0,89             | 1,88        | 8,37E-02 | 1,00E+00    |
| Nudcd3        | -0,14       | 0,89             | 2,19        | 8,61E-02 | 1,00E+00    |
| 9330111N05Rik | -1,64       | -0,75            | 0,10        | 8,74E-02 | 1,00E+00    |
| Gm12854       | -0,14       | 0,75             | 1,60        | 9,74E-02 | 1,00E+00    |
| mt-Co3        | -0,20       | 1,02             | 2,49        | 9,76E-02 | 1,00E+00    |
| Aurkb         | -2,70       | -1,23            | 0,24        | 1,05E-01 | 1,00E+00    |
| mt-Nd4l       | -0,31       | 1,37             | 3,04        | 1,06E-01 | 1,00E+00    |
| Esd           | -0,17       | 0,72             | 1,54        | 1,07E-01 | 1,00E+00    |
| mt-Rnr2       | -0,20       | 0,89             | 2,01        | 1,16E-01 | 1,00E+00    |
| Gm43743       | -0,34       | 1,26             | 2,66        | 1,21E-01 | 1,00E+00    |
| Mrpl3         | -2,49       | -1,09            | 0,31        | 1,27E-01 | 1,00E+00    |

**Table S5:** Differential gene expression between fresh and cryopreserved MDCK cells. (MARS-Seq; top 40 genes).

| Gene                | Lower bound | log2 fold change | Upper bound | p-value  | Adj p-value |
|---------------------|-------------|------------------|-------------|----------|-------------|
| ENSCAFG00000008021  | 1,24        | 2,15             | 2,99        | 8,84E-07 | 7,86E-03    |
| ENSCAFG000000029945 | 0,71        | 1,51             | 2,25        | 7,46E-05 | 2,45E-01    |
| ENSCAFG000000017688 | 0,94        | 1,95             | 2,95        | 8,25E-05 | 2,45E-01    |
| ENSCAFG000000022711 | 0,74        | 1,68             | 2,59        | 3,68E-04 | 6,67E-01    |
| ENSCAFG00000008336  | 0,97        | 2,18             | 3,26        | 3,75E-04 | 6,67E-01    |
| ENSCAFG000000022713 | 0,64        | 1,58             | 2,59        | 9,56E-04 | 1,00E+00    |
| ENSCAFG000000018174 | 0,50        | 1,31             | 2,12        | 1,01E-03 | 1,00E+00    |
| ENSCAFG000000022726 | 0,74        | 1,91             | 3,12        | 1,39E-03 | 1,00E+00    |
| ENSCAFG000000022729 | 0,77        | 1,88             | 3,32        | 1,40E-03 | 1,00E+00    |
| ENSCAFG000000022709 | 0,60        | 1,81             | 3,09        | 2,41E-03 | 1,00E+00    |
| ENSCAFG000000022717 | 0,44        | 1,51             | 2,65        | 4,46E-03 | 1,00E+00    |
| ENSCAFG000000029619 | 0,30        | 1,18             | 2,01        | 6,12E-03 | 1,00E+00    |
| ENSCAFG000000018187 | 0,27        | 1,07             | 1,85        | 6,66E-03 | 1,00E+00    |
| ENSCAFG000000022742 | 0,37        | 1,48             | 2,62        | 8,30E-03 | 1,00E+00    |
| ENSCAFG000000030258 | 0,34        | 1,38             | 2,32        | 8,67E-03 | 1,00E+00    |
| ENSCAFG000000023471 | 0,20        | 0,87             | 1,51        | 9,26E-03 | 1,00E+00    |
| ENSCAFG000000029710 | 0,37        | 1,58             | 2,82        | 9,31E-03 | 1,00E+00    |
| ENSCAFG000000005295 | 0,24        | 1,51             | 2,82        | 1,63E-02 | 1,00E+00    |
| ENSCAFG000000022730 | 0,37        | 1,88             | 3,02        | 1,63E-02 | 1,00E+00    |
| ENSCAFG000000016711 | 0,07        | 0,84             | 1,61        | 3,20E-02 | 1,00E+00    |
| ENSCAFG000000022728 | 0,10        | 1,38             | 2,69        | 3,27E-02 | 1,00E+00    |
| ENSCAFG000000004385 | -8,36       | -3,49            | -0,20       | 4,07E-02 | 1,00E+00    |
| ENSCAFG000000001778 | 0,00        | 1,07             | 2,01        | 4,68E-02 | 1,00E+00    |
| ENSCAFG000000007932 | -2,28       | -1,07            | 0,00        | 5,11E-02 | 1,00E+00    |
| ENSCAFG000000008870 | -1,48       | -0,71            | 0,00        | 5,49E-02 | 1,00E+00    |
| ENSCAFG000000015605 | -0,07       | 1,07             | 2,18        | 5,81E-02 | 1,00E+00    |
| ENSCAFG000000017066 | -0,03       | 0,74             | 1,48        | 6,04E-02 | 1,00E+00    |
| ENSCAFG000000022735 | -0,03       | 0,97             | 1,81        | 6,48E-02 | 1,00E+00    |
| ENSCAFG000000028869 | -0,13       | 0,81             | 1,68        | 8,40E-02 | 1,00E+00    |
| ENSCAFG000000007812 | -0,13       | 0,74             | 1,58        | 8,80E-02 | 1,00E+00    |
| ENSCAFG000000006810 | -0,13       | 0,77             | 1,65        | 8,95E-02 | 1,00E+00    |
| ENSCAFG000000012979 | -0,13       | 0,71             | 1,48        | 9,35E-02 | 1,00E+00    |
| ENSCAFG000000009922 | -0,17       | 0,74             | 1,65        | 9,89E-02 | 1,00E+00    |
| ENSCAFG000000010888 | -2,15       | -0,97            | 0,17        | 1,02E-01 | 1,00E+00    |
| ENSCAFG000000007478 | -2,69       | -1,21            | 0,24        | 1,03E-01 | 1,00E+00    |
| ENSCAFG000000013664 | -3,32       | -1,44            | 0,27        | 1,03E-01 | 1,00E+00    |
| ENSCAFG000000016028 | -0,27       | 1,24             | 2,65        | 1,04E-01 | 1,00E+00    |
| ENSCAFG000000006747 | -0,27       | 1,21             | 2,72        | 1,06E-01 | 1,00E+00    |
| ENSCAFG000000007894 | -0,24       | 0,94             | 2,05        | 1,06E-01 | 1,00E+00    |
| ENSCAFG000000018898 | -2,59       | -1,18            | 0,24        | 1,08E-01 | 1,00E+00    |

**Table S6:** Differential gene expression between fresh and cryopreserved HEK293 cells. (SMARTseq2; top 40 genes).

| <b>Gene</b>   | <b>Lower bound</b> | <b>log2 fold change</b> | <b>Upper bound</b> | <b>p-value</b> | <b>Adj p-value</b> |
|---------------|--------------------|-------------------------|--------------------|----------------|--------------------|
| PLAU          | 1,81               | 3,31                    | 4,17               | 2,00E-08       | <b>3,30E-04</b>    |
| COLGALT2      | -4,29              | -3,31                   | -1,88              | 1,17E-06       | <b>9,72E-03</b>    |
| APOM          | -2,42              | -1,69                   | -1,05              | 2,26E-06       | <b>1,25E-02</b>    |
| NR4A3         | 1,53               | 2,83                    | 3,94               | 5,09E-06       | <b>2,11E-02</b>    |
| L3MBTL1       | 1,43               | 2,58                    | 3,56               | 8,07E-06       | <b>2,41E-02</b>    |
| TMEM38A       | 1,14               | 2,16                    | 3,02               | 8,74E-06       | <b>2,41E-02</b>    |
| ANKRD34B      | 1,37               | 2,83                    | 3,72               | 1,74E-05       | <b>4,12E-02</b>    |
| DGKH          | 1,53               | 2,93                    | 4,07               | 2,08E-05       | <b>4,31E-02</b>    |
| ABCA1         | 1,56               | 3,97                    | 5,34               | 3,13E-05       | <b>5,75E-02</b>    |
| RP11-348P10.2 | 1,40               | 3,05                    | 4,01               | 3,67E-05       | <b>6,08E-02</b>    |
| EPHB3         | 1,11               | 3,18                    | 4,42               | 4,08E-05       | <b>6,15E-02</b>    |
| RP11-338I21.1 | 0,79               | 1,72                    | 2,45               | 9,50E-05       | <b>1,31E-01</b>    |
| RP11-996F15.6 | 0,57               | 1,49                    | 2,29               | 1,60E-04       | <b>2,04E-01</b>    |
| STAP2         | -2,19              | -1,43                   | -0,67              | 2,90E-04       | <b>3,43E-01</b>    |
| WDR17         | -3,59              | -2,51                   | -1,27              | 3,71E-04       | <b>4,10E-01</b>    |
| ZNF416        | 0,99               | 2,29                    | 3,50               | 4,72E-04       | <b>4,89E-01</b>    |
| AURKC         | -2,45              | -1,62                   | -0,64              | 6,60E-04       | <b>6,43E-01</b>    |
| SAMD9         | -3,47              | -2,23                   | -0,95              | 7,39E-04       | <b>6,67E-01</b>    |
| CTD-3001H11.2 | 0,48               | 1,30                    | 2,07               | 7,72E-04       | <b>6,67E-01</b>    |
| IDNK          | 0,89               | 2,07                    | 3,05               | 8,05E-04       | <b>6,67E-01</b>    |
| PLEKHA6       | 0,48               | 1,97                    | 2,99               | 1,15E-03       | <b>8,59E-01</b>    |
| HSD17B14      | 0,67               | 1,88                    | 2,83               | 1,16E-03       | <b>8,59E-01</b>    |
| CARD9         | 0,48               | 1,30                    | 2,13               | 1,23E-03       | <b>8,59E-01</b>    |
| BSN           | -3,82              | -2,51                   | -0,99              | 1,27E-03       | <b>8,59E-01</b>    |
| SCN5A         | 0,70               | 1,91                    | 2,93               | 1,30E-03       | <b>8,59E-01</b>    |
| CCDC120       | -2,83              | -1,84                   | -0,76              | 1,39E-03       | <b>8,59E-01</b>    |
| TMEM178B      | 0,92               | 2,48                    | 4,04               | 1,41E-03       | <b>8,59E-01</b>    |
| HUNK          | 1,11               | 2,89                    | 4,39               | 1,45E-03       | <b>8,59E-01</b>    |
| SHOX2         | 0,73               | 2,13                    | 3,24               | 1,62E-03       | <b>8,99E-01</b>    |
| C14orf93      | 0,70               | 1,88                    | 3,43               | 1,64E-03       | <b>8,99E-01</b>    |
| RP11-680F8.1  | 0,32               | 1,53                    | 2,45               | 1,68E-03       | <b>8,99E-01</b>    |
| RP11-29B2.6   | 0,29               | 0,99                    | 1,78               | 1,79E-03       | <b>9,24E-01</b>    |
| HOXA4         | 0,54               | 1,53                    | 2,48               | 2,03E-03       | <b>9,90E-01</b>    |
| SATB1-AS1     | 0,32               | 1,14                    | 2,10               | 2,03E-03       | <b>9,90E-01</b>    |
| EMX2          | -2,10              | -1,30                   | -0,51              | 2,12E-03       | <b>1,00E+00</b>    |
| CCBE1         | -3,91              | -2,45                   | -0,89              | 2,39E-03       | <b>1,00E+00</b>    |
| CAHM          | 0,45               | 1,34                    | 2,16               | 2,47E-03       | <b>1,00E+00</b>    |
| TTLL13P       | 0,73               | 2,03                    | 3,02               | 2,81E-03       | <b>1,00E+00</b>    |
| MFI2-AS1      | 0,29               | 0,86                    | 1,62               | 2,94E-03       | <b>1,00E+00</b>    |
| MCF2L         | 0,51               | 1,62                    | 2,54               | 3,16E-03       | <b>1,00E+00</b>    |

**Table S7:** Differential gene expression between fresh and cryopreserved K562 cells. (SMARTseq2; top 40 genes).

| <b>Gene</b> | <b>Lower bound</b> | <b>log2 fold change</b> | <b>Upper bound</b> | <b>p-value</b> | <b>Adj p-value</b> |
|-------------|--------------------|-------------------------|--------------------|----------------|--------------------|
| HEY1        | 3,34               | 4,53                    | 5,42               | 1,31E-09       | <b>2,13E-05</b>    |
| PRR16       | 2,48               | 4,26                    | 5,29               | 2,36E-08       | <b>1,93E-04</b>    |
| SMIM14      | 2,31               | 3,50                    | 4,50               | 1,61E-07       | <b>7,13E-04</b>    |
| ASS1        | -4,66              | -3,54                   | -2,02              | 1,87E-07       | <b>7,13E-04</b>    |
| MMP11       | 1,92               | 2,94                    | 3,87               | 2,18E-07       | <b>7,13E-04</b>    |
| PALMD       | 2,25               | 3,67                    | 4,56               | 8,37E-07       | <b>2,28E-03</b>    |
| ZNF665      | 1,82               | 3,27                    | 4,20               | 1,21E-06       | <b>2,82E-03</b>    |
| FBXW8       | 1,55               | 2,94                    | 3,87               | 1,72E-06       | <b>3,52E-03</b>    |
| DOCK4       | 1,65               | 3,47                    | 4,40               | 4,89E-06       | <b>8,89E-03</b>    |
| FUT1        | 1,59               | 3,40                    | 4,73               | 5,44E-06       | <b>8,90E-03</b>    |
| RP3-425C14  | 1,32               | 2,71                    | 3,60               | 9,54E-06       | <b>1,42E-02</b>    |
| LINC00879   | 1,19               | 2,61                    | 3,67               | 1,15E-05       | <b>1,56E-02</b>    |
| GRB7        | 1,12               | 2,35                    | 3,34               | 1,28E-05       | <b>1,61E-02</b>    |
| ZNF726      | 1,92               | 3,24                    | 4,20               | 2,13E-05       | <b>2,49E-02</b>    |
| ZNF354A     | 1,19               | 2,58                    | 3,67               | 2,30E-05       | <b>2,51E-02</b>    |
| LYSMD1      | 1,39               | 2,61                    | 3,70               | 3,41E-05       | <b>3,48E-02</b>    |
| FYN         | 1,85               | 3,44                    | 4,53               | 4,10E-05       | <b>3,94E-02</b>    |
| PPP1R27     | 1,02               | 1,95                    | 2,81               | 5,06E-05       | <b>4,59E-02</b>    |
| RAG1        | 1,02               | 3,24                    | 4,46               | 5,76E-05       | <b>4,96E-02</b>    |
| CD302       | -3,04              | -2,02                   | -0,89              | 6,09E-05       | <b>4,98E-02</b>    |
| RP11-480I12 | 0,96               | 2,35                    | 3,47               | 6,87E-05       | <b>5,12E-02</b>    |
| TCAF2       | 1,59               | 3,07                    | 4,13               | 6,88E-05       | <b>5,12E-02</b>    |
| HECW2       | 0,96               | 3,37                    | 4,40               | 7,77E-05       | <b>5,52E-02</b>    |
| CTC-559E9.  | 0,76               | 1,95                    | 3,21               | 9,25E-05       | <b>6,13E-02</b>    |
| MCC         | 0,89               | 2,91                    | 4,00               | 9,37E-05       | <b>6,13E-02</b>    |
| RP11-483I13 | 0,89               | 2,18                    | 3,17               | 1,08E-04       | <b>6,78E-02</b>    |
| RHOBTB2     | -3,24              | -2,25                   | -0,96              | 1,30E-04       | <b>7,85E-02</b>    |
| HECA        | 1,65               | 3,50                    | 4,73               | 1,63E-04       | <b>9,53E-02</b>    |
| PRG2        | -6,91              | -4,66                   | -1,55              | 1,79E-04       | <b>9,89E-02</b>    |
| RAB27B      | 1,39               | 4,20                    | 5,62               | 1,81E-04       | <b>9,89E-02</b>    |
| INHBE       | 0,69               | 2,68                    | 4,10               | 2,67E-04       | <b>1,41E-01</b>    |
| LINC01088   | 1,12               | 2,41                    | 3,70               | 2,79E-04       | <b>1,43E-01</b>    |
| RP11-474G2  | 1,12               | 2,58                    | 3,64               | 5,31E-04       | <b>2,56E-01</b>    |
| FIBCD1      | 0,53               | 1,45                    | 2,35               | 5,40E-04       | <b>2,56E-01</b>    |
| HCFC2       | 1,32               | 3,54                    | 4,53               | 5,48E-04       | <b>2,56E-01</b>    |
| RP11-1017G  | 0,73               | 2,08                    | 3,07               | 6,18E-04       | <b>2,81E-01</b>    |
| TRMT44      | 1,09               | 2,68                    | 4,00               | 7,17E-04       | <b>3,17E-01</b>    |
| FOXN3       | 1,02               | 2,48                    | 3,64               | 8,02E-04       | <b>3,45E-01</b>    |
| AP000349.2  | 0,43               | 0,99                    | 1,72               | 9,95E-04       | <b>4,17E-01</b>    |
| SAP30L      | 0,76               | 1,85                    | 2,68               | 1,25E-03       | <b>5,09E-01</b>    |

**Table S8:** Differential gene expression between fresh and cryopreserved PBMC.  
(MARS-Seq; top 40 genes).

| <b>Gene</b>   | <b>Lower bound</b> | <b>log2 fold change</b> | <b>Upper bound</b> | <b>p-value</b> | <b>Adj p-value</b> |
|---------------|--------------------|-------------------------|--------------------|----------------|--------------------|
| RPS29         | 0,81               | 1,77                    | 2,74               | 2,81E-04       | <b>1,00E+00</b>    |
| NKG7          | -2,43              | -1,50                   | -0,66              | 5,68E-04       | <b>1,00E+00</b>    |
| RPL9P9        | 0,89               | 2,47                    | 6,17               | 2,94E-03       | <b>1,00E+00</b>    |
| GNLY          | -5,74              | -4,08                   | -0,92              | 7,41E-03       | <b>1,00E+00</b>    |
| CD7           | -2,04              | -1,08                   | -0,23              | 1,27E-02       | <b>1,00E+00</b>    |
| RPS27         | 0,19               | 1,16                    | 2,27               | 1,59E-02       | <b>1,00E+00</b>    |
| RPS24         | 0,35               | 1,89                    | 5,51               | 1,62E-02       | <b>1,00E+00</b>    |
| RPLP2         | 0,15               | 1,19                    | 2,20               | 2,04E-02       | <b>1,00E+00</b>    |
| PFN1          | -1,73              | -0,92                   | -0,15              | 2,40E-02       | <b>1,00E+00</b>    |
| RPS20         | 0,08               | 1,04                    | 1,97               | 2,86E-02       | <b>1,00E+00</b>    |
| CST7          | -1,93              | -1,00                   | -0,08              | 3,37E-02       | <b>1,00E+00</b>    |
| GZMB          | -2,08              | -1,08                   | -0,12              | 3,40E-02       | <b>1,00E+00</b>    |
| SPON2         | -2,31              | -1,12                   | -0,12              | 3,49E-02       | <b>1,00E+00</b>    |
| DAPK1         | 0,08               | 1,66                    | 4,35               | 3,68E-02       | <b>1,00E+00</b>    |
| ACTB          | -2,12              | -1,08                   | -0,08              | 3,80E-02       | <b>1,00E+00</b>    |
| ACTG1         | -1,58              | -0,81                   | -0,08              | 3,86E-02       | <b>1,00E+00</b>    |
| IKZF3         | -3,55              | -1,62                   | -0,08              | 4,12E-02       | <b>1,00E+00</b>    |
| TYROBP        | -1,97              | -1,00                   | -0,04              | 4,19E-02       | <b>1,00E+00</b>    |
| CTD-3148I10.9 | 0,04               | 2,20                    | 5,97               | 4,60E-02       | <b>1,00E+00</b>    |
| RPS10-NUDT3   | 0,00               | 0,77                    | 1,50               | 4,65E-02       | <b>1,00E+00</b>    |
| TXNIP         | -1,62              | -0,81                   | -0,04              | 4,66E-02       | <b>1,00E+00</b>    |
| BIN2          | -2,12              | -1,04                   | -0,04              | 4,69E-02       | <b>1,00E+00</b>    |
| RPL19         | 0,00               | 0,96                    | 1,85               | 4,77E-02       | <b>1,00E+00</b>    |
| PRF1          | -1,81              | -0,89                   | 0,00               | 5,10E-02       | <b>1,00E+00</b>    |
| RPS10         | -0,04              | 0,77                    | 1,54               | 5,22E-02       | <b>1,00E+00</b>    |
| FCGR3A        | -1,97              | -0,96                   | 0,00               | 5,34E-02       | <b>1,00E+00</b>    |
| RPL11         | -0,04              | 1,04                    | 2,08               | 5,65E-02       | <b>1,00E+00</b>    |
| TMSB4X        | -2,85              | -1,16                   | 0,04               | 6,20E-02       | <b>1,00E+00</b>    |
| CCND3         | -1,93              | -0,92                   | 0,04               | 6,36E-02       | <b>1,00E+00</b>    |
| B2M           | -0,08              | 0,77                    | 1,58               | 6,42E-02       | <b>1,00E+00</b>    |
| TSEN54        | -6,47              | -2,66                   | 0,23               | 6,73E-02       | <b>1,00E+00</b>    |
| RPL26         | -0,12              | 0,96                    | 2,31               | 7,03E-02       | <b>1,00E+00</b>    |
| RP11-849F2.7  | -0,12              | 0,96                    | 2,31               | 7,03E-02       | <b>1,00E+00</b>    |
| GZMH          | -1,62              | -0,77                   | 0,04               | 7,26E-02       | <b>1,00E+00</b>    |
| RPS19         | -0,12              | 0,92                    | 1,93               | 7,47E-02       | <b>1,00E+00</b>    |
| ADCY7         | -3,97              | -1,62                   | 0,15               | 7,49E-02       | <b>1,00E+00</b>    |
| COMMD1        | -0,23              | 1,85                    | 5,66               | 7,64E-02       | <b>1,00E+00</b>    |
| ZNF675        | -4,01              | -1,66                   | 0,19               | 7,71E-02       | <b>1,00E+00</b>    |
| ZNF836        | -6,20              | -2,47                   | 0,27               | 7,73E-02       | <b>1,00E+00</b>    |
| RAC2          | -1,58              | -0,73                   | 0,08               | 8,03E-02       | <b>1,00E+00</b>    |



**Table S9:** Differential gene expression between a fresh and cryopreserved PDOX.  
(MARSseq; top 40 genes).

| <b>Gene</b>    | <b>Lower bound</b> | <b>log2 fold change</b> | <b>Upper bound</b> | <b>p-value</b> | <b>Adj p-value</b> |
|----------------|--------------------|-------------------------|--------------------|----------------|--------------------|
| ZFP36          | 0,79               | 1,65                    | 2,50               | 1,23E-04       | <b>5,38E-01</b>    |
| LITAF          | 0,75               | 1,61                    | 2,40               | 1,34E-04       | <b>5,38E-01</b>    |
| KRT19          | -2,98              | -1,89                   | -0,93              | 1,36E-04       | <b>5,38E-01</b>    |
| LEFTY1         | 0,79               | 1,85                    | 2,95               | 3,48E-04       | <b>9,01E-01</b>    |
| NR4A1          | 0,62               | 1,47                    | 2,33               | 3,80E-04       | <b>9,01E-01</b>    |
| FOSB           | 0,62               | 1,44                    | 2,30               | 5,16E-04       | <b>9,71E-01</b>    |
| GDF15          | 0,75               | 1,85                    | 2,88               | 5,73E-04       | <b>9,71E-01</b>    |
| IER2           | 0,51               | 1,27                    | 2,02               | 7,12E-04       | <b>1,00E+00</b>    |
| PTMAP2         | -2,47              | -1,54                   | -0,65              | 7,86E-04       | <b>1,00E+00</b>    |
| IL6            | 0,58               | 1,58                    | 2,54               | 1,09E-03       | <b>1,00E+00</b>    |
| MDK            | 0,51               | 1,37                    | 2,19               | 1,12E-03       | <b>1,00E+00</b>    |
| PTMAP5         | -2,30              | -1,44                   | -0,58              | 1,29E-03       | <b>1,00E+00</b>    |
| SLC35F5        | 0,51               | 1,44                    | 2,40               | 1,99E-03       | <b>1,00E+00</b>    |
| TPM4           | 0,45               | 1,30                    | 2,13               | 2,12E-03       | <b>1,00E+00</b>    |
| FTH1           | 0,38               | 1,58                    | 2,71               | 3,11E-03       | <b>1,00E+00</b>    |
| IGFBP3         | 0,27               | 1,44                    | 2,50               | 3,12E-03       | <b>1,00E+00</b>    |
| PRODH          | -2,13              | -1,23                   | -0,41              | 3,41E-03       | <b>1,00E+00</b>    |
| EGR1           | 0,31               | 1,10                    | 1,82               | 3,99E-03       | <b>1,00E+00</b>    |
| LMO3           | 0,65               | 2,19                    | 3,87               | 4,54E-03       | <b>1,00E+00</b>    |
| SOD2           | 0,34               | 1,17                    | 1,99               | 4,76E-03       | <b>1,00E+00</b>    |
| TNFAIP3        | 0,38               | 1,27                    | 2,19               | 5,11E-03       | <b>1,00E+00</b>    |
| UBC            | 0,27               | 1,10                    | 1,82               | 6,22E-03       | <b>1,00E+00</b>    |
| BTG2           | 0,38               | 1,47                    | 2,88               | 6,35E-03       | <b>1,00E+00</b>    |
| TUSC3          | 0,31               | 1,13                    | 2,02               | 6,62E-03       | <b>1,00E+00</b>    |
| RIMKLB         | 0,45               | 1,68                    | 3,05               | 6,84E-03       | <b>1,00E+00</b>    |
| MTMR12         | 0,31               | 1,20                    | 2,19               | 7,22E-03       | <b>1,00E+00</b>    |
| RBPMS          | 0,24               | 0,99                    | 1,75               | 7,74E-03       | <b>1,00E+00</b>    |
| SAT1           | 0,24               | 0,99                    | 1,71               | 7,94E-03       | <b>1,00E+00</b>    |
| CALB1          | -2,47              | -1,41                   | -0,38              | 8,00E-03       | <b>1,00E+00</b>    |
| PTMAP4         | -2,30              | -1,30                   | -0,34              | 8,73E-03       | <b>1,00E+00</b>    |
| RDH10          | 0,27               | 1,17                    | 2,13               | 9,52E-03       | <b>1,00E+00</b>    |
| CD81           | 0,21               | 0,96                    | 1,71               | 9,56E-03       | <b>1,00E+00</b>    |
| USP43          | 0,24               | 1,10                    | 1,95               | 1,06E-02       | <b>1,00E+00</b>    |
| RP11-529H20.3  | -2,37              | -1,30                   | -0,31              | 1,18E-02       | <b>1,00E+00</b>    |
| CD74           | 0,27               | 1,34                    | 2,57               | 1,22E-02       | <b>1,00E+00</b>    |
| IL1R1          | 0,45               | 2,16                    | 3,87               | 1,25E-02       | <b>1,00E+00</b>    |
| IDO2           | 0,48               | 2,13                    | 3,87               | 1,27E-02       | <b>1,00E+00</b>    |
| RP11-307E17.11 | -1,99              | -1,10                   | -0,24              | 1,31E-02       | <b>1,00E+00</b>    |
| RPS11          | 0,17               | 0,86                    | 1,51               | 1,32E-02       | <b>1,00E+00</b>    |
| TXNRD1         | 0,17               | 0,89                    | 1,58               | 1,33E-02       | <b>1,00E+00</b>    |
